# Supplementary material for: How to design efficient cluster randomised trials
Source: PubMed Central journal article supplement — BMJ. 2017 Jul 13;358:j3064. doi: 10.1136/bmj.j3064 (PMC5508848; doi:10.1136/bmj.j3064), 2017-07-13
Supplement: hemk038129.ww2.pdf [file hemk038129.ww2.pdf]

Supplementary Figure 1: Power and precision curves for case study for ICC of 0.01

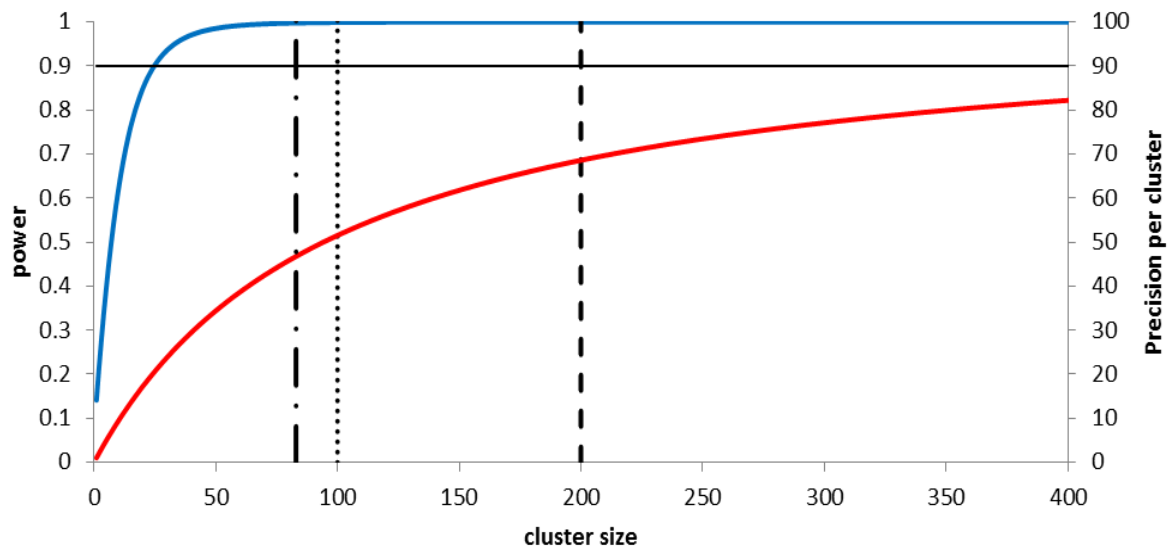

Caption: Curves show increases in power (blue line) and precision (red line) as cluster size increases. Assumes a CRT with 10 clusters per arm, designed to detect a difference between two proportions 0.6 and 0.45 at a two-sided significance level of 5%. Large dash dot line represent cluster size in case study (85) and other dashed lines represent attempts at identification of points of diminishing returns (see main text: small dash -  $1/ICC$  ; medium dash  $2/ICC$ ).

Supplementary Figure 2: Power and precision curves for case study for ICC of 0.05

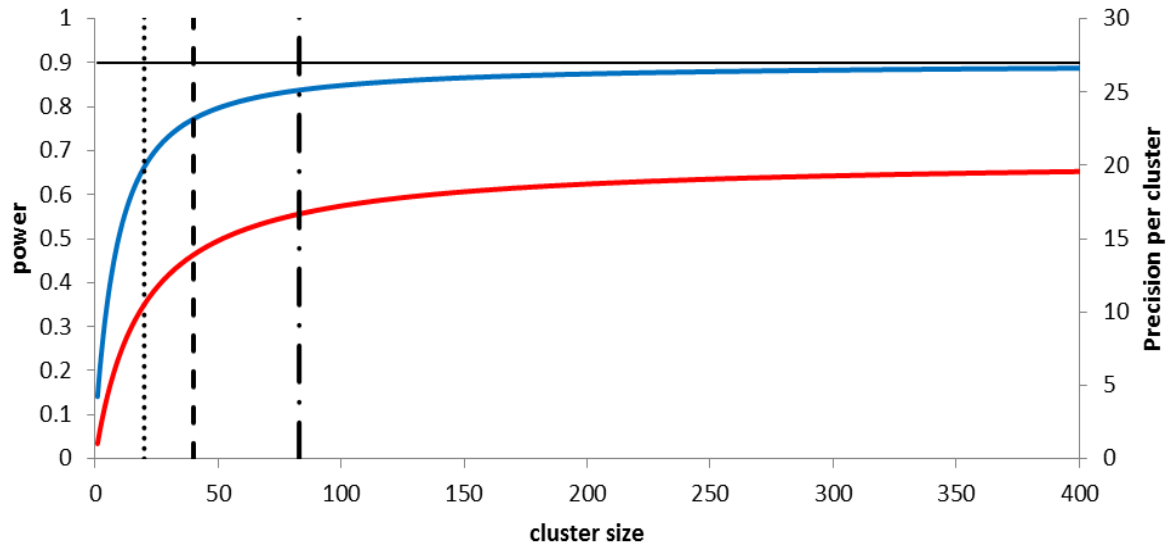

Caption: Curves show increases in power (blue line) and precision (red line) as cluster size increases. Assumes a CRT with 10 clusters per arm, designed to detect a difference between two proportions 0.6 and 0.45 at a two-sided significance level of 5%. Large dash dot line represent cluster size in case study (85) and other dashed lines represent attempts at identification of points of diminishing returns (see main text: small dash -  $1/ICC$  ; medium dash  $2/ICC$ ).
